# Supplementary material for: Novel salivary gland allergens from tropical mosquito species and IgE reactivity in allergic patients
Source: PubMed Central journal article supplement — World Allergy Organ J. 2020 Feb 17;13(2):100099. doi: 10.1016/j.waojou.2020.100099 (PMC7031643; doi:10.1016/j.waojou.2020.100099), 2020-02-17
Supplement: mmc1.pdf [file mmc1.pdf]

# Supplementary Fig.1

```

Aed a 2      MKLPLLL--AIVTTFSSVASTGPFDPPEEMLFTFTRCMEDNLEDGPNRLPMLAKWKEWINE      58
D712 Alb1   MNILLVLAVVTISSLALVTAKGPFDPPEEMHFIFTRCMEDNLEKDGPDVRVKTLLKWKKEWVTE      60
D712 Alb2   MNLPLVLAVVTISSLVALVTAKGPFDPPEEMHFIFTRCMEDNLEKDGPDVRVETLLKWKKEWVTE      60
*:: *:* . ::::.*::.****** * *****:***.*: * *****:.*

Aed a 2      PVDSPATQCFGKCVLVRTGLYDPVAQKFDASVIEQEQFKAYPSLGEKSKVEAYANAVQQLP      118
D712 Alb1   PKDDPATHCFAKCVLEMSGLYDAASGKFDASVIEAQHKAYPNSEDKGVDAFVKAVQALP      120
D712 Alb2   PRDDPATHCFAKCVLEMSGLYDAASGKFDASVIEAQHKAYPNSEDKGVDAFVKAVQGLP      120
* *.***:*.*** :*** .: *****: *.***. :*.*** :.*** **

Aed a 2      STNNDCAAVFKAYDPVHKAHKDTSKNLFHGNKELTKGLYEKLGKDIRQKQSYFEFCENK      178
D712 Alb1   PTKNDCTAVFRAFQPVHMAHKATSINLFHDNKALTKGIYEKLGKDIRQKQSYFEFCENK      180
D712 Alb2   PTKNDCTAVFRAFQPVHMAHKATSINLFHDNKALTKGIYEKLGKDIRQKQSYFEFCENK      180
*:***:***:*.*** ** * * * * * .** *****:*****:*****

Aed a 2      YYPAGSDKRQQLCKIRQYTVLDDALFKEHTDCVMKGIYITKNNELDAEEVKRDFMQVNK      238
D712 Alb1   HYPVGSPPKRSDLCKIRQYVVLDDAQFKQHTDCIMKGLRYITKDNILNCDEIKRDFKQVNK      240
D712 Alb2   HYPVGSPPKRSDLCKIRQYVVLDDAQFKQHTDCIMKGLRYITKDNILNCDEIKRDFKQVNK      240
:*.** **.:*****.***** *:***:***:***:***:*.***:*.*** **

Aed a 2      DTKALEKVLNDCKSKEPSNAGEKSWHYKCLVESSVKDDFKEAFDYREVRSQIYAFNLPK      298
D712 Alb1   DTGALEKVLNTCKAKEPRDVKEKSWHYKCLVESSVANDFKEAFDYREVRSQNYGYHLMQ      300
D712 Alb2   DTGALEKVLNTCKAKEPRDVKEKSWHYKCLVESSVNDFKEAFDYREVRSQNYGYHLMQ      300
** ***** **:*** :. *****:*****:***** *:***:

Aed a 2      KQVYSKPAVQSQVMEIDGKQCPQ      321
D712 Alb1   KQPYNKPAVQAQVSEVDGKQCPS      323
D712 Alb2   KQQYNKPAVQAQVSEVDGKQCPS      323
** *.***:*.***:*****.

```

Aed a 2: P18153|ALL2\_AEDAE 37 kDa salivary gland allergen Aed a 2 [*A aegypti*]  
 D712 Alb1: AAV90666.1 long form D7 salivary protein D712 [*A albopictus*]  
 D712 Alb2: JAC10971.1 putative long form d7 salivary protein d712 [*A albopictus*]

|           | Aed a 2 | D712 Alb1 | D712 Alb2 |
|-----------|---------|-----------|-----------|
| Aed a 2   | 100.00  | 68.85     | 69.47     |
| D712 Alb1 | 68.85   | 100.00    | 97.21     |
| D712 Alb2 | 69.47   | 97.21     | 100.00    |
